# Supplementary material for: Label-free selective detection of ampicillin drug in human urine samples using silver nanoparticles as a colorimetric sensing probe
Source: Royal Society of Chemistry journal article supplement (doi:10.1039/c7nj00448f), 2017-01-01
Supplement: c7nj00448f1.pdf [file c7nj00448f1.pdf]

**Electronic Supplementary Information**

**Label-free selective detection of ampicillin drug in human urine samples using  
silver nanoparticles as a colorimetric sensing probe**

**Kamlesh Shrivastava<sup>1,2\*</sup>, Jharna Sahu<sup>1</sup>, Pathik Maji<sup>1</sup> and Deepak Sinha<sup>3</sup>**

**<sup>1</sup>Department of Chemistry, Guru Ghasidas Vishwavidyalaya, Koni, Bilaspur, CG-495009,  
India**

**<sup>2</sup>School of Studies in Chemistry, Pt. Ravishankar Shukla University, Raipur, CG-492010,  
India**

**<sup>3</sup>Department of Chemistry, Government Nagarjuna Post Graduate College of Science,  
Raipur, CG-492010, India**

**\*Corresponding author: Email:kshrivas@gmail.com**

**Phone: +91-7752-260488**

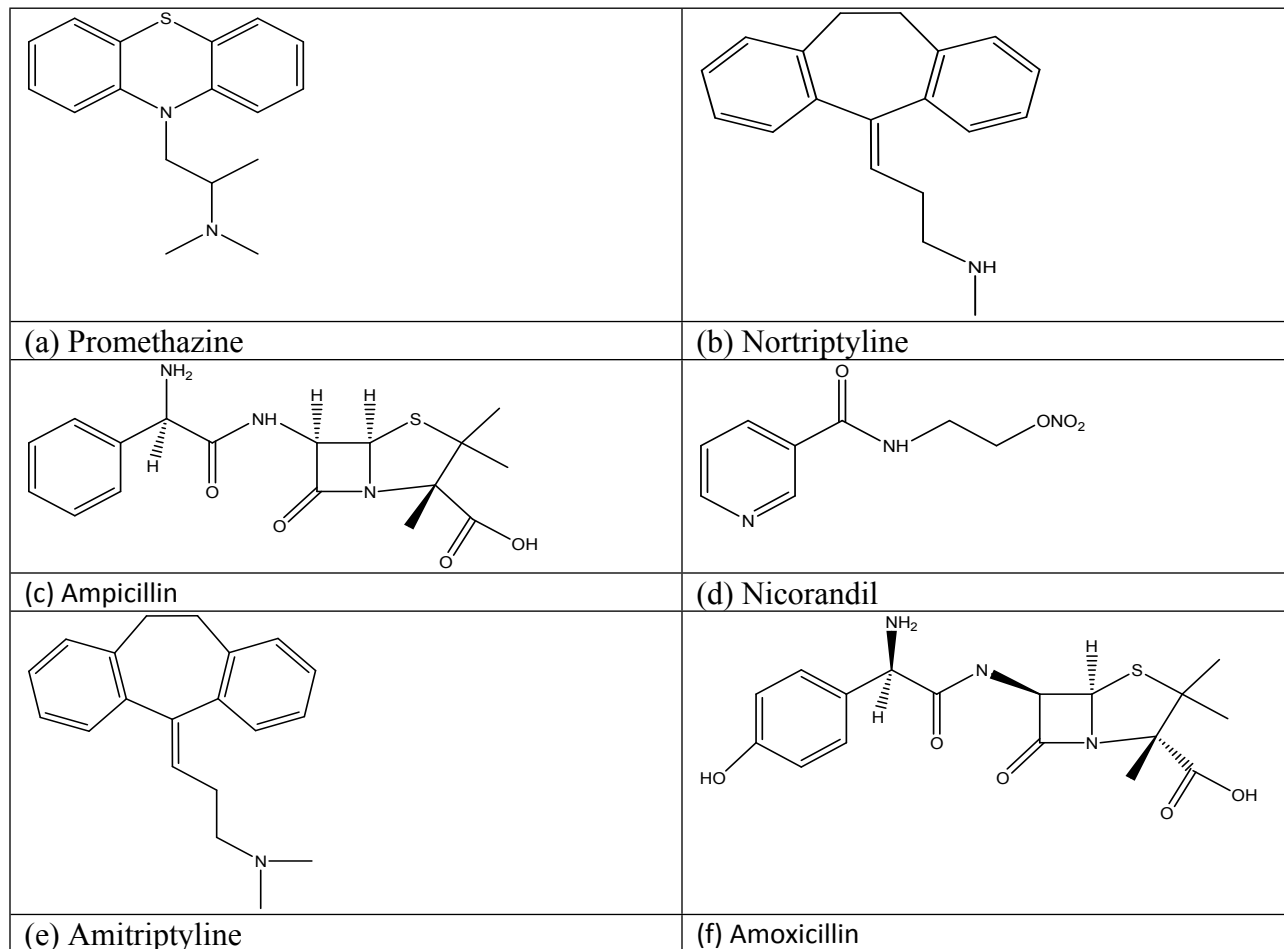

**Fig. S1:** Structure of drugs: (a) promethazine, (b) nortriptyline, (c) ampicillin, (d) nicorandil, (e) amitriptyline and (f) amoxicillin

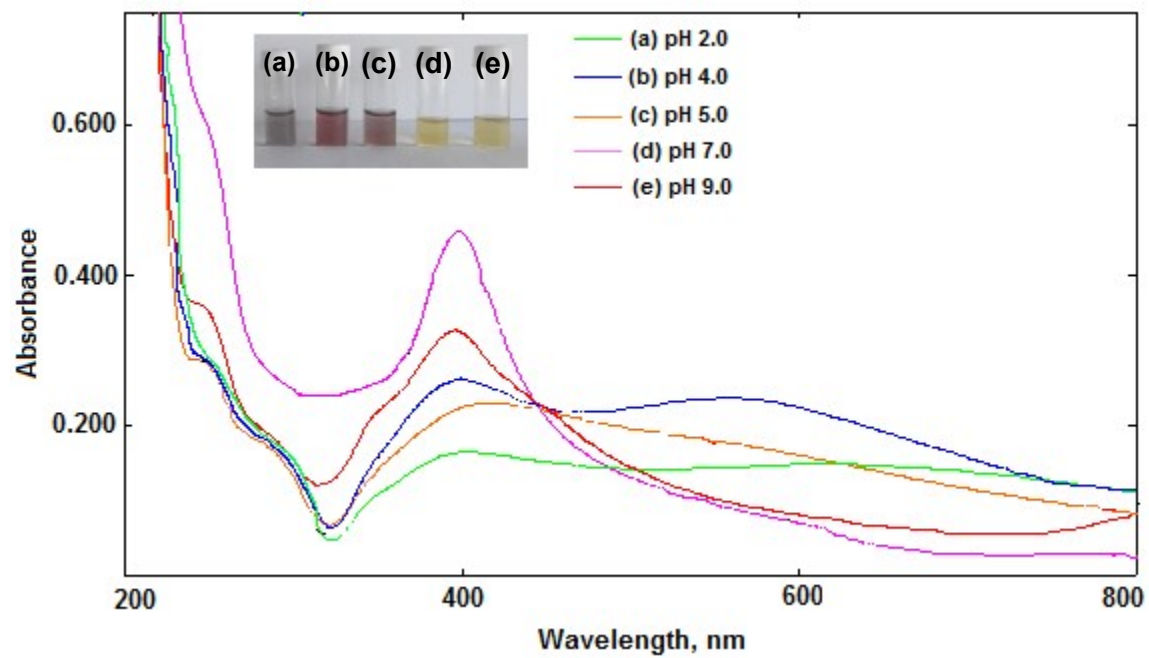

**Fig. S2.** Effect of pH (2.0, 4.0, 5.0, 7.0 and 9.0) on the detection of ampicillin drug using AgNPs as a LSPR colorimetric probe

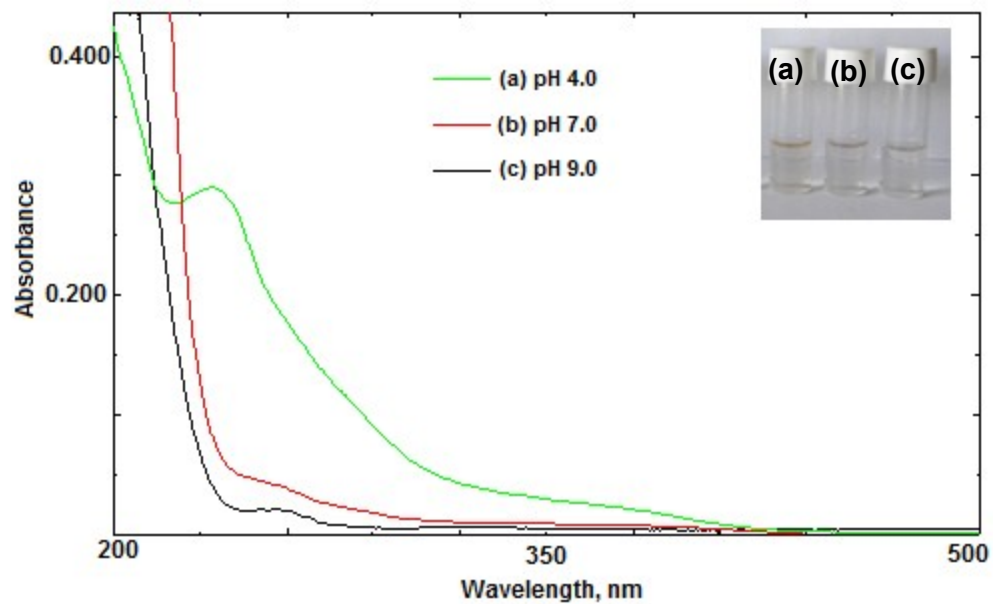

**Fig. S3.** UV-visible spectra of ampicillin drug ( $500 \mu\text{g mL}^{-1}$ ) after hydrolyzed with pH 4.0, 7.0 and 9.0 solution and reaction time of 5 min at room temperature

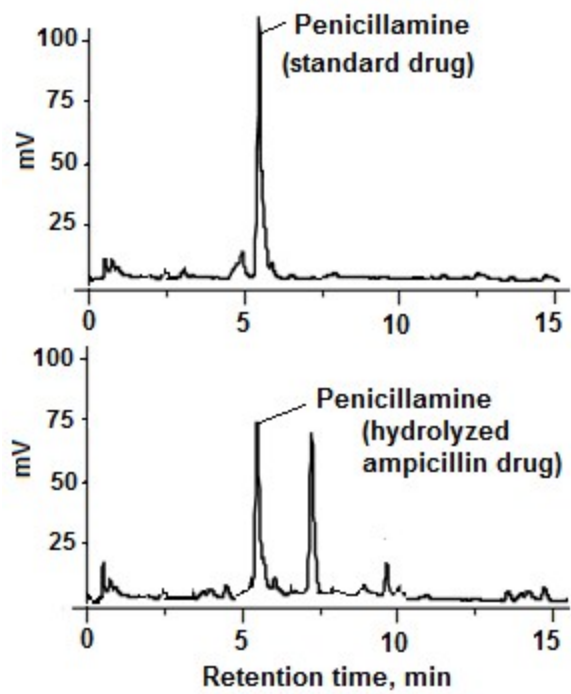

**Fig. S4.** HPLC chromatograph of hydrolysis product of ampicillin drug ( $500 \mu\text{g mL}^{-1}$ ) with pH

4.0
